# Supplementary material for: Dual-processable semi-aromatic fluorinated polyimides with outstanding optical transparency and low dielectric constants prepared from in situ [2 + 2] thermal polymerization
Source: Royal Society of Chemistry journal article supplement (doi:10.1039/d4py00568f), 2024-01-01
Supplement: d4py00568f1.pdf [file d4py00568f1.pdf]

*Supporting Information*

Dual-Processable Semi-Aromatic Fluorinated Polyimides with  
Outstanding Optical Transparency and Low Dielectric Constant  
Prepared from *In-situ* [2+2] Thermal Polymerization

*Hongzhu Chen, Qihua Wu, Lijun Chen, Weixian Zhang, Xiaoli Li, Jianbo Peng, Jiajia Wang\**

Key Laboratory of Polymeric Materials & Application Technology of Hunan Province, Key  
Laboratory of Advanced Organic Functional Materials of College of Hunan Province, College  
of Chemistry, Xiangtan University, Xiangtan 411105, Hunan Province, P. R. China

Corresponding author e-mail: [wangjiajia@xtu.edu.cn](mailto:wangjiajia@xtu.edu.cn) (Jiajia Wang)

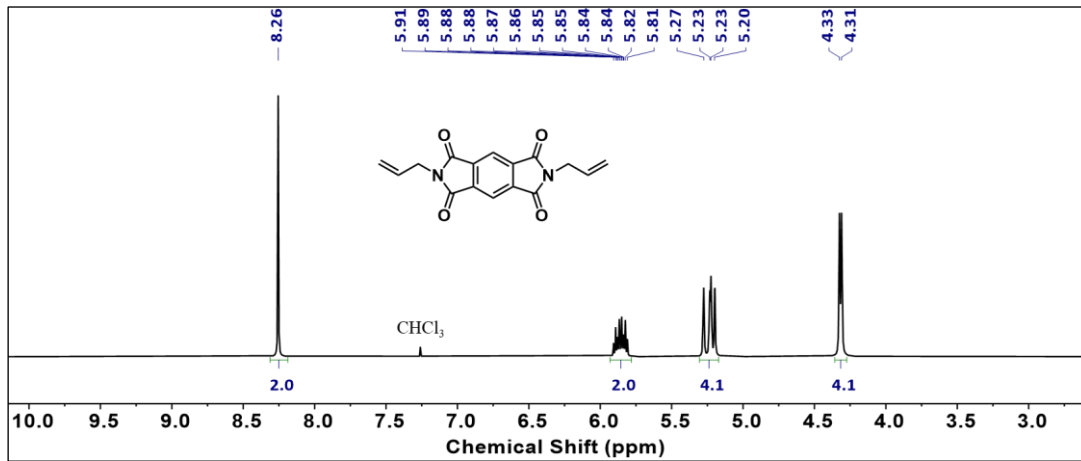

Fig.S1  $^1\text{H}$  NMR spectrum of PMDA-Allyl ( $\text{CDCl}_3$ , 400 MHz)

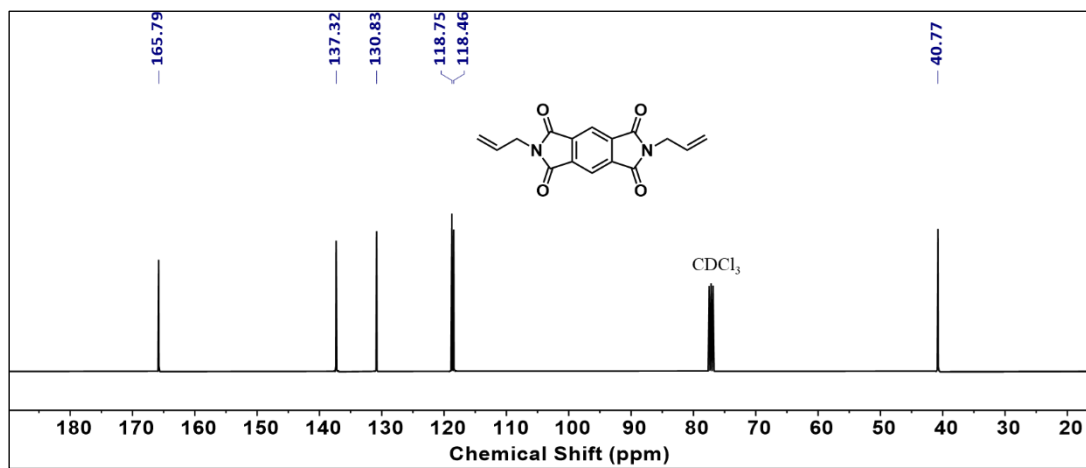

Fig. S2  $^{13}\text{C}$  NMR spectrum of PMDA-Allyl ( $\text{CDCl}_3$ , 101 MHz)

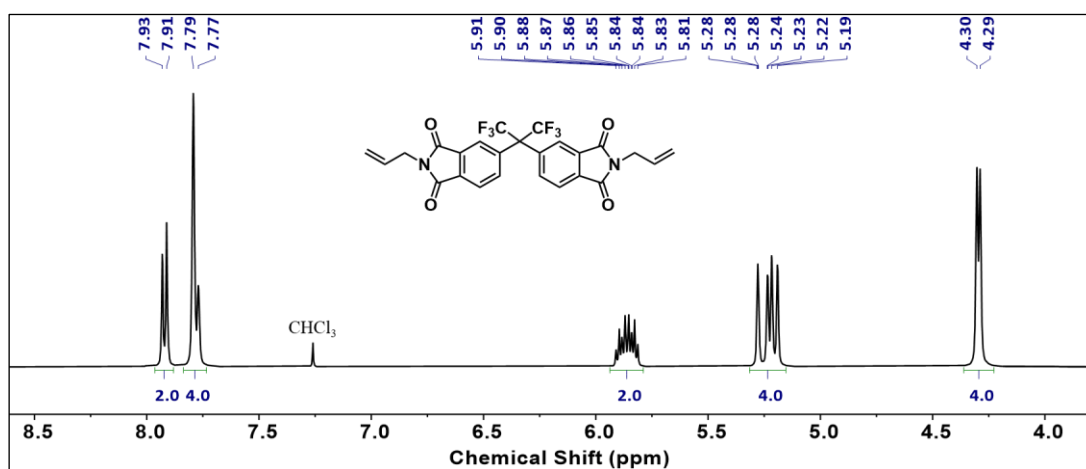

Fig. S3  $^1\text{H}$  NMR spectrum of 6FDA-Allyl ( $\text{CDCl}_3$ , 400 MHz)

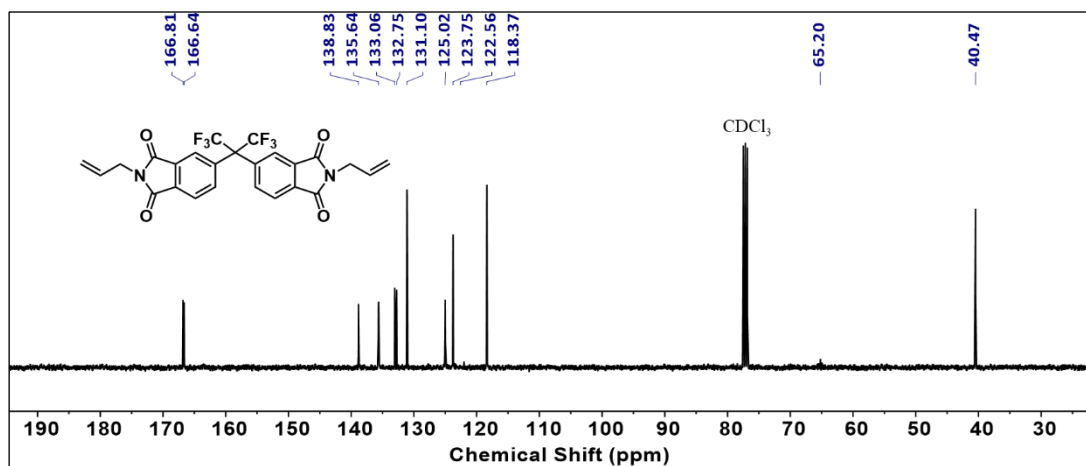

Fig. S4 <sup>13</sup>C NMR spectrum of 6FDA-Allyl (CDCl<sub>3</sub>, 101 MHz)

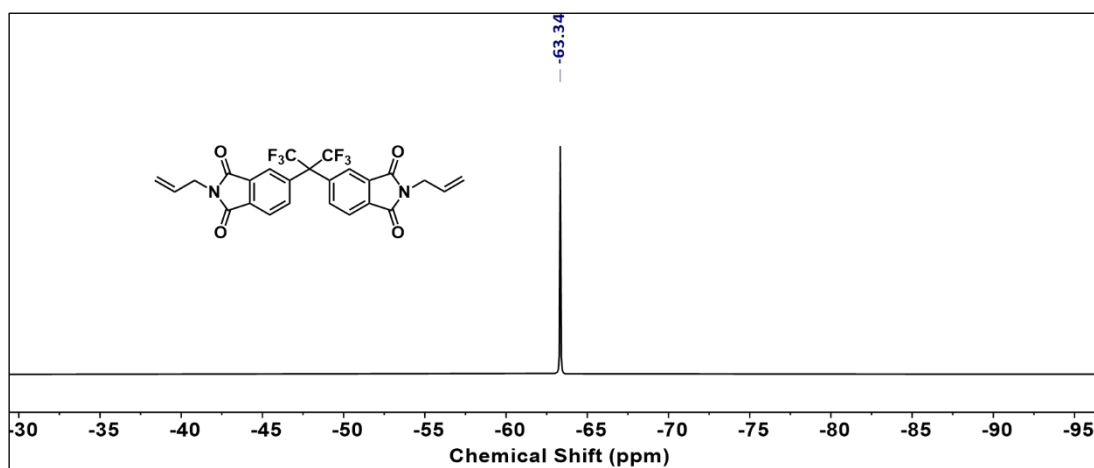

Fig. S5 <sup>19</sup>F NMR spectrum of 6FDA-Allyl (CDCl<sub>3</sub>, 376 MHz)

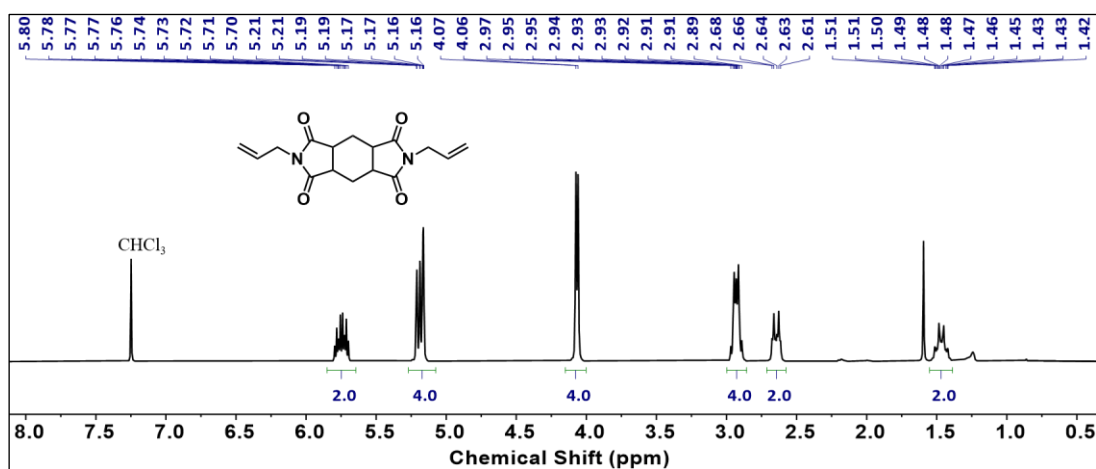

Fig. S6 <sup>1</sup>H NMR spectrum of HPMDA-Allyl (CDCl<sub>3</sub>, 400 MHz)

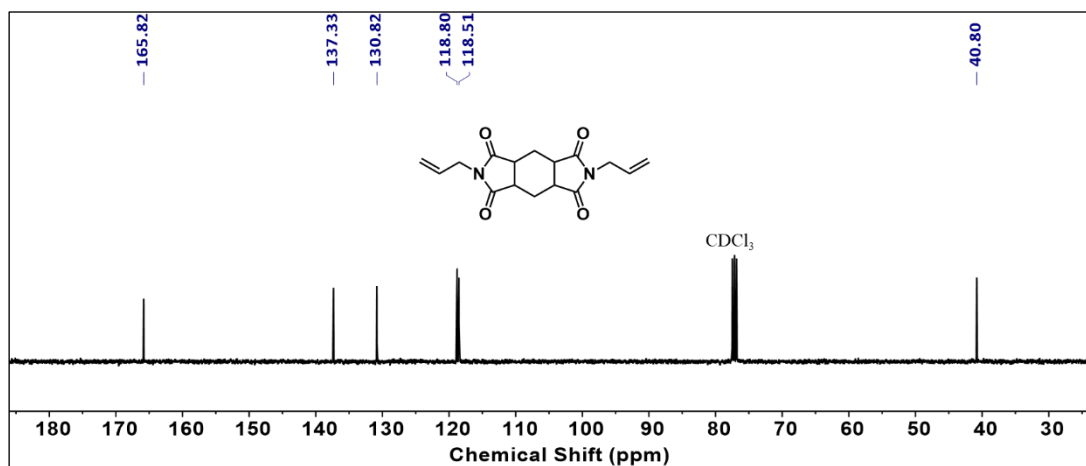

Fig. S7 <sup>13</sup>C NMR spectrum of HPMDA-Allyl (CDCl<sub>3</sub>, 101 MHz)

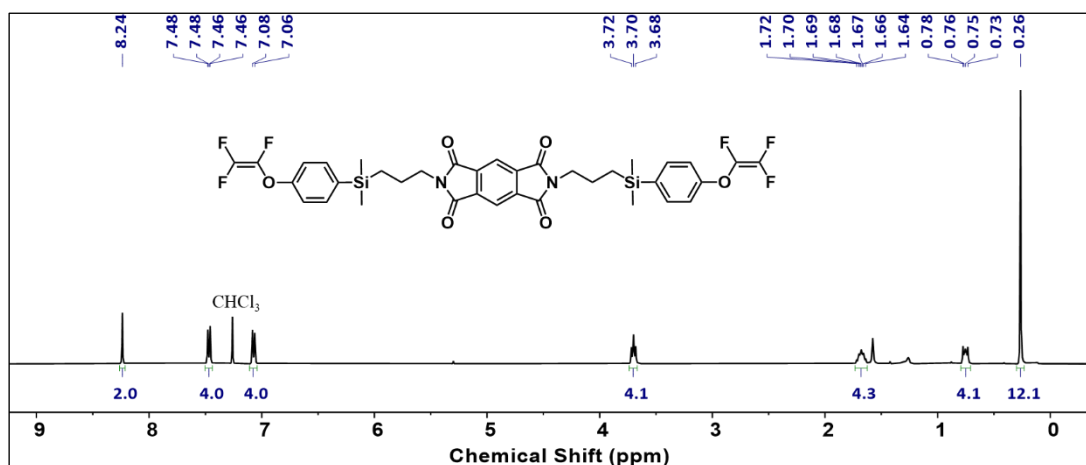

Fig. S8 <sup>1</sup>H NMR spectrum of PMDA-TFVE (CDCl<sub>3</sub>, 400 MHz)

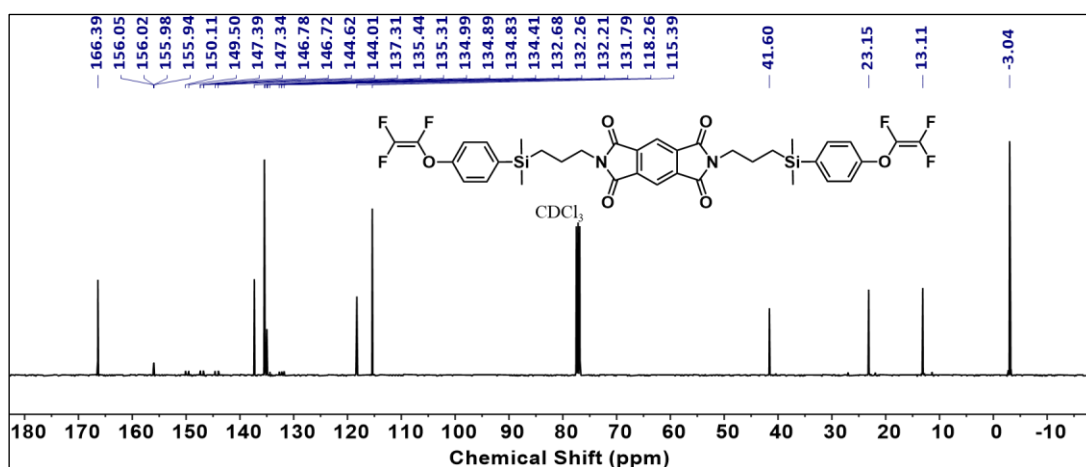

Fig. S9 <sup>13</sup>C NMR spectrum of PMDA-TFVE (CDCl<sub>3</sub>, 101 MHz)

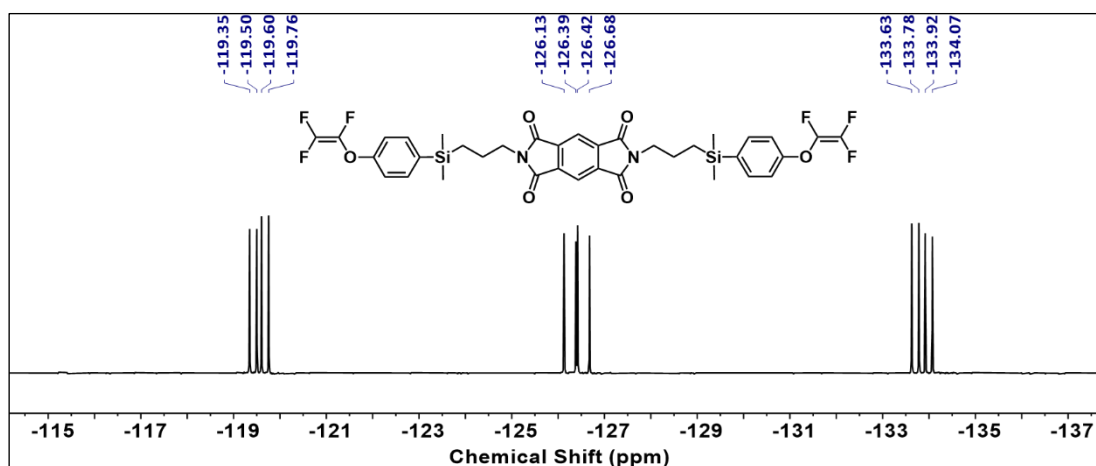

Fig. S10  $^{19}\text{F}$  NMR spectrum of PMDA-TFVE ( $\text{CDCl}_3$ , 376 MHz)

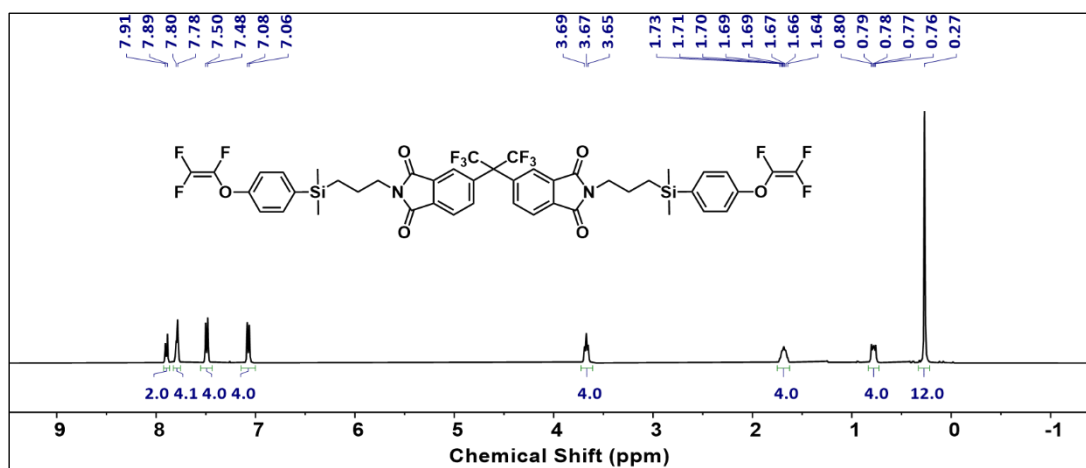

Fig. S11  $^1\text{H}$  NMR spectrum of 6FDA-TFVE ( $\text{CDCl}_3$ , 400 MHz)

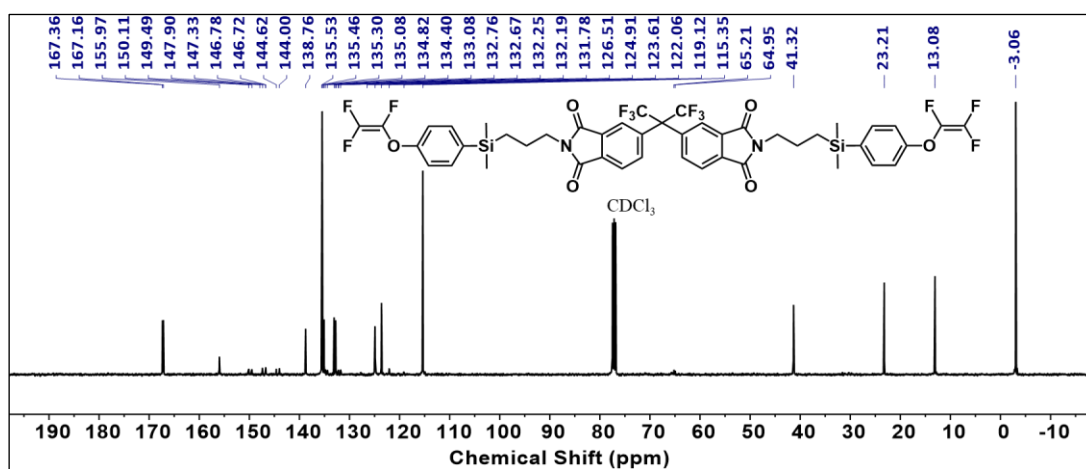

Fig. S12  $^{13}\text{C}$  NMR spectrum of 6FDA-TFVE ( $\text{CDCl}_3$ , 101 MHz)



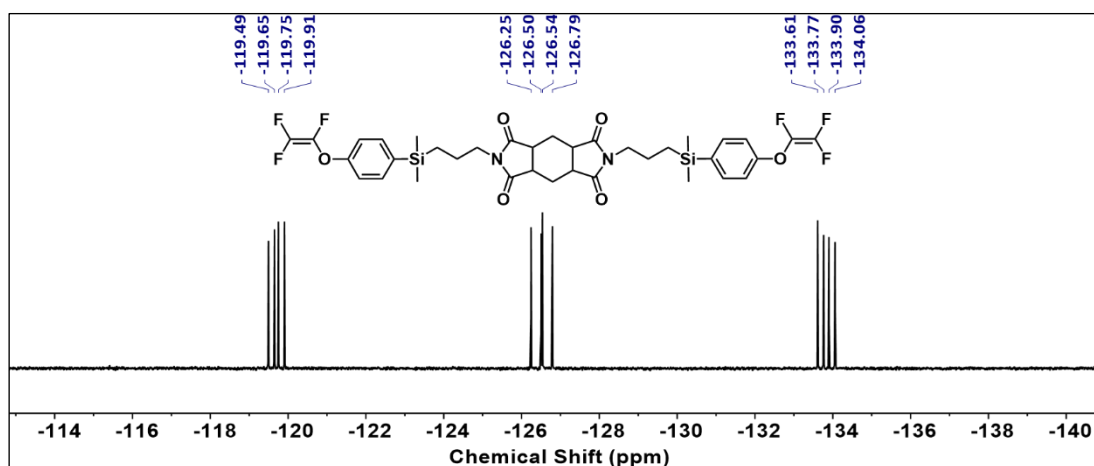

Fig. S16  $^{19}\text{F}$  NMR spectrum of HPMDA-TFVE ( $\text{CDCl}_3$ , 376 MHz)

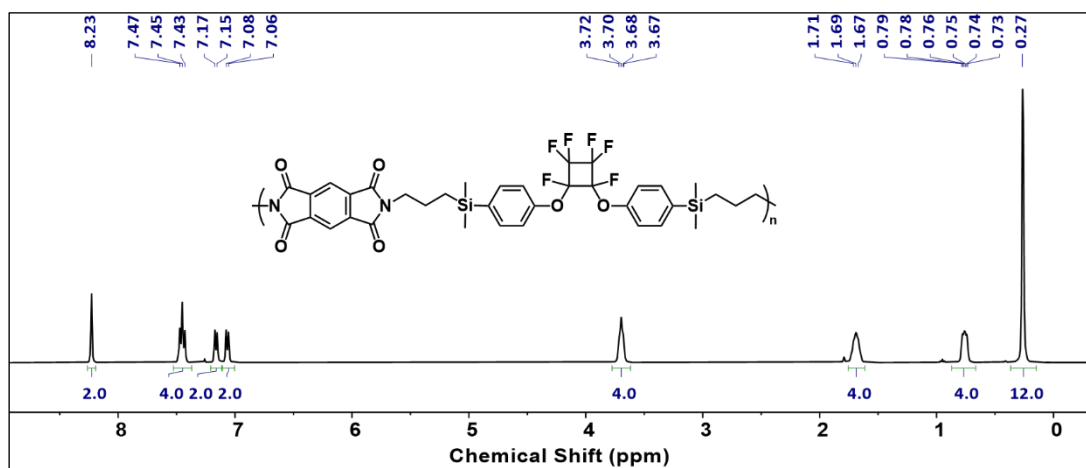

Fig. S17  $^1\text{H}$  NMR spectrum of PMDA-PFCB ( $\text{CDCl}_3$ , 400 MHz)

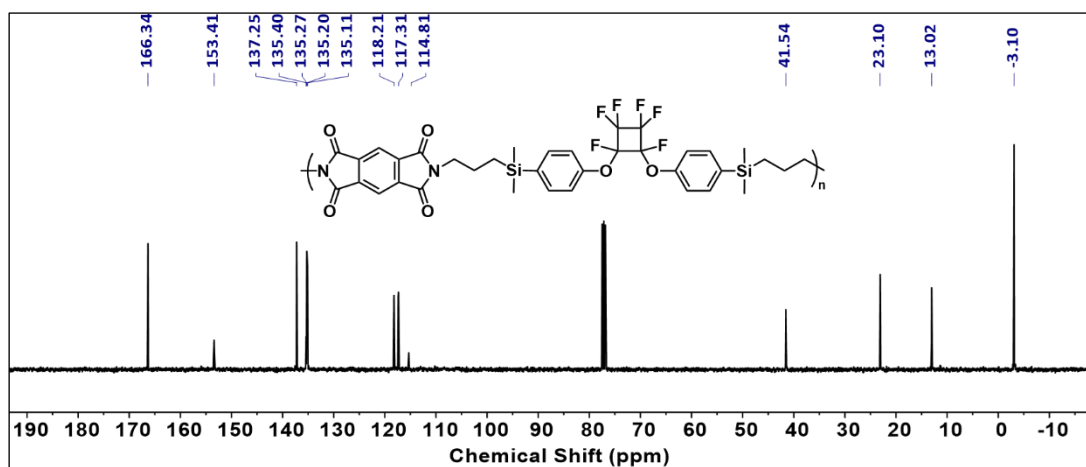

Fig. S18  $^{13}\text{C}$  NMR spectrum of PMDA-PFCB ( $\text{CDCl}_3$ , 101 MHz)

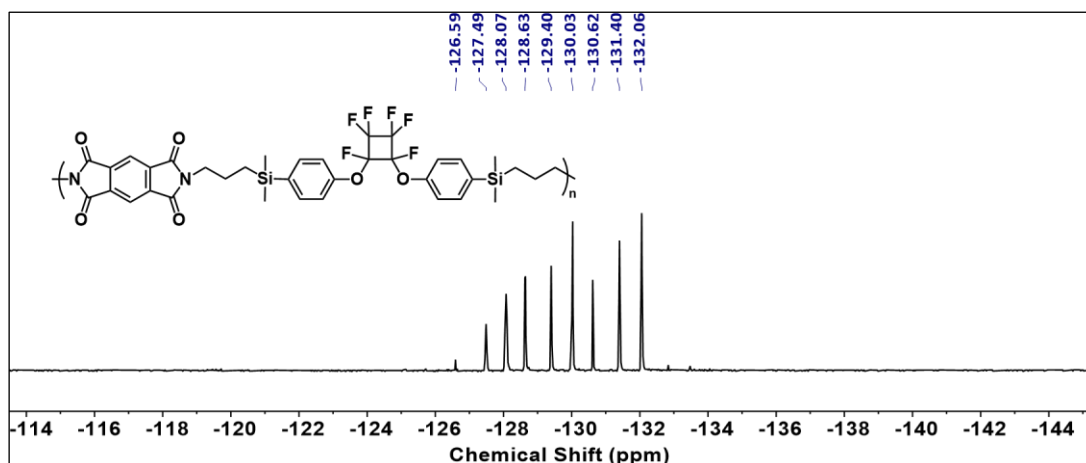

Fig. S19 <sup>19</sup>F NMR spectrum of PMDA-PFCB (CDCl<sub>3</sub>, 376 MHz)

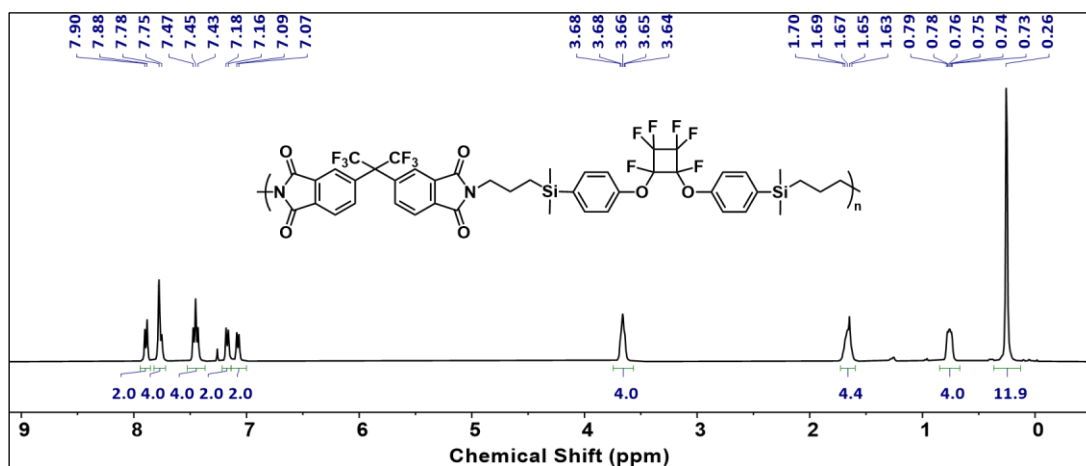

Fig. S20 <sup>1</sup>H NMR spectrum of 6FDA-PFCB (CDCl<sub>3</sub>, 400 MHz)

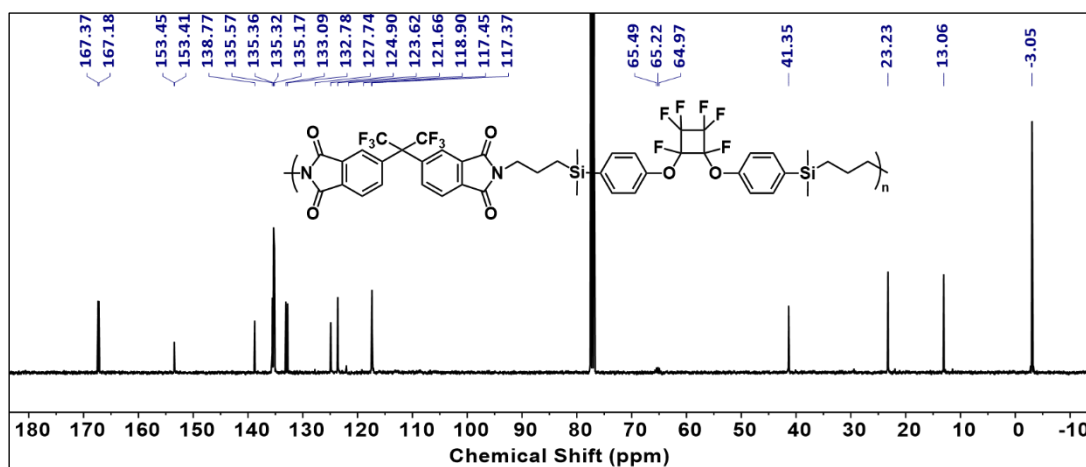

Fig. S21 <sup>13</sup>C NMR spectrum of 6FDA-PFCB (CDCl<sub>3</sub>, 101 MHz)



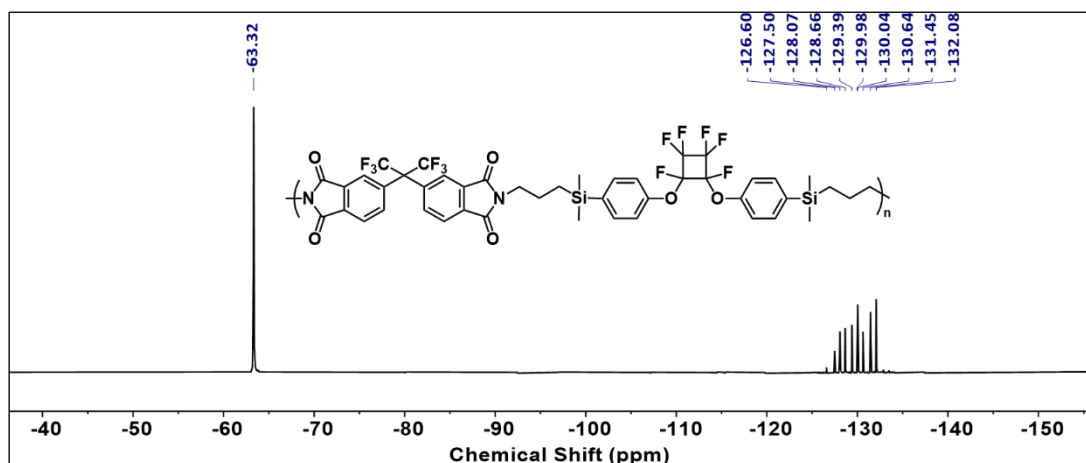

Fig. S22  $^{19}\text{F}$  NMR spectrum of 6FDA-PFCB ( $\text{CDCl}_3$ , 376 MHz)

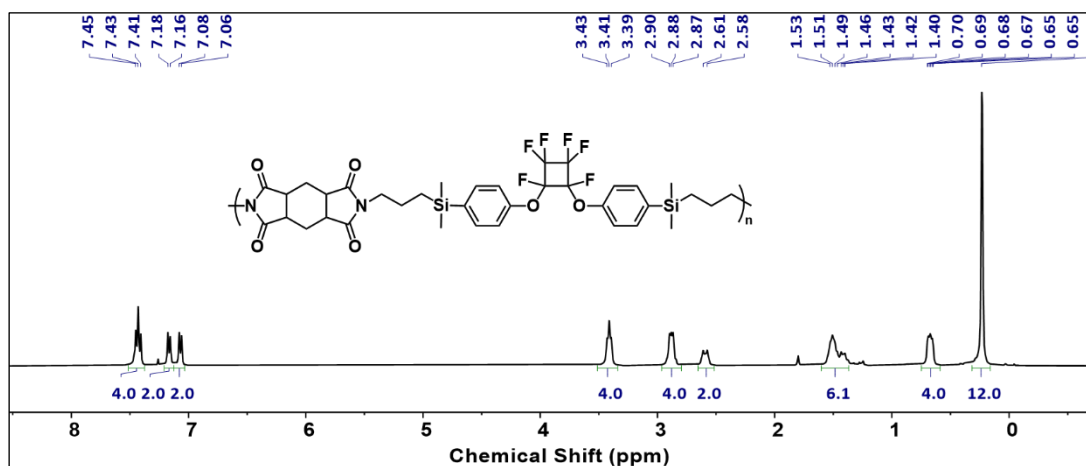

Fig. S23  $^1\text{H}$  NMR spectrum of HPMDA-PFCB ( $\text{CDCl}_3$ , 400 MHz)

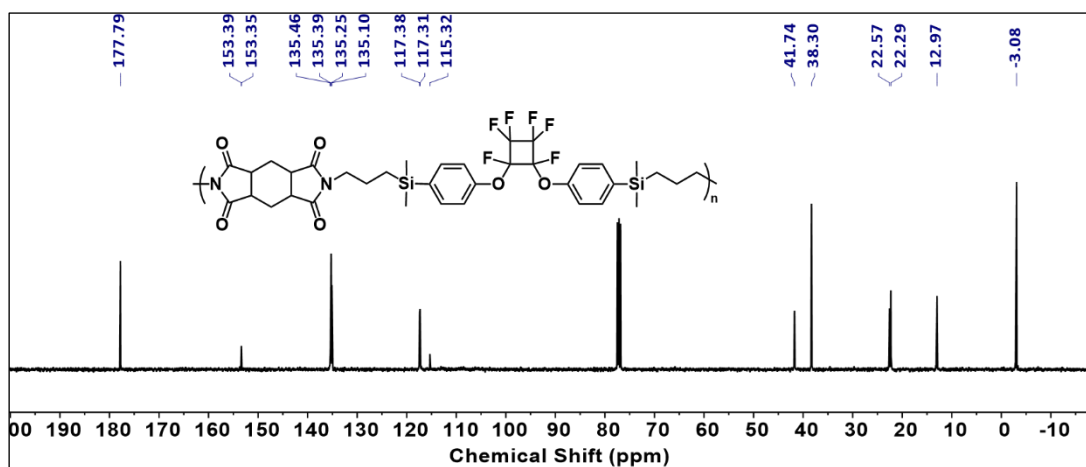

Fig. S24  $^{13}\text{C}$  NMR spectrum of HPMDA-PFCB ( $\text{CDCl}_3$ , 101 MHz)

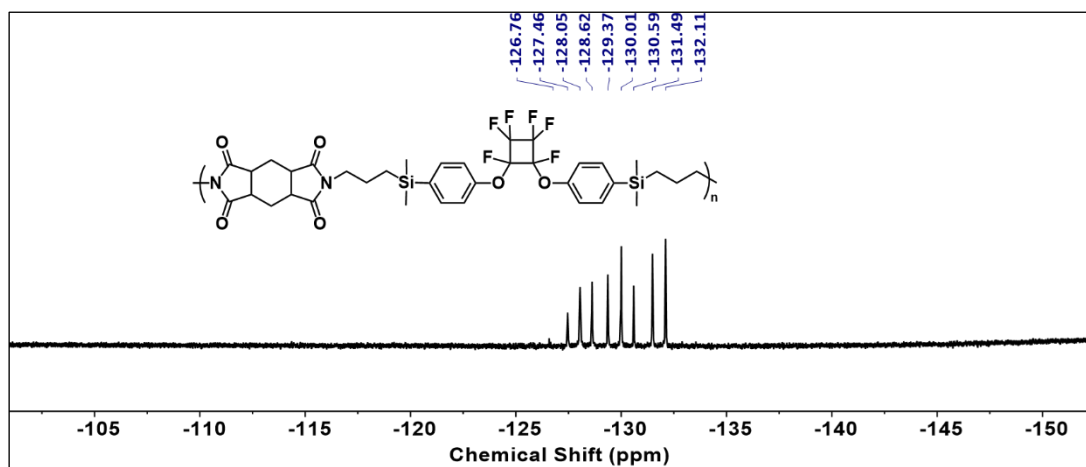

Fig. S25  $^{19}\text{F}$  NMR spectrum of HPMDA-PFCB ( $\text{CDCl}_3$ , 376 MHz)

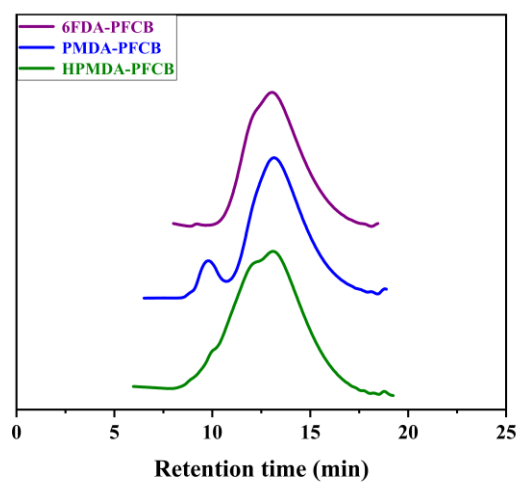

Fig. S26 GPC traces of polyimides.

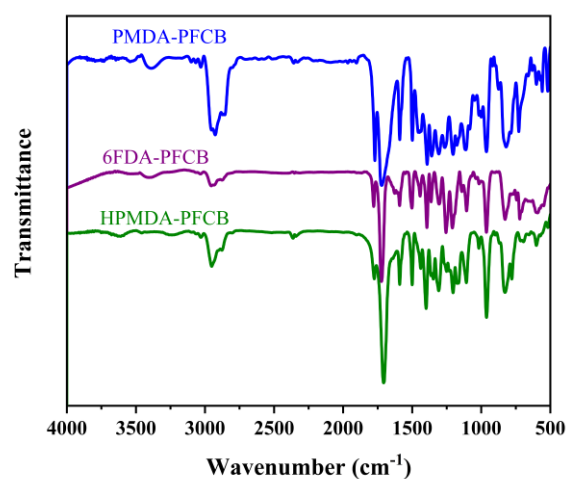

Fig. S27 FT-IR spectra of the polymers in full range.

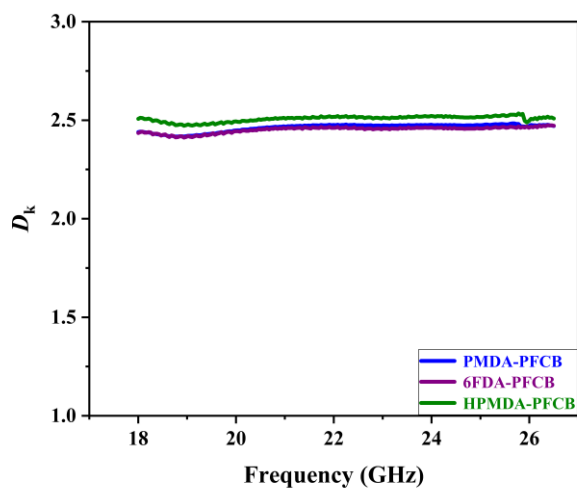

Fig. S28  $D_k$  values of polyimides in ranges of frequencies under room temperature.

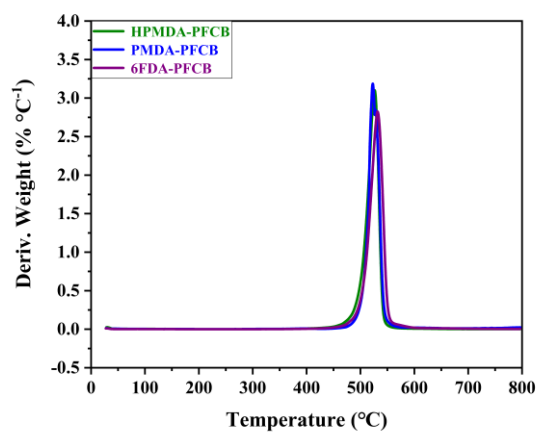

Fig. S29 DTG curves of the polyimides at a heating rate of 10 °C min<sup>-1</sup> in N<sub>2</sub>.

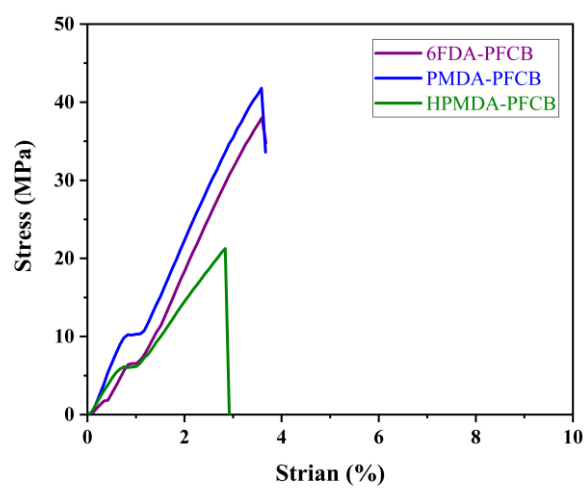

Fig. S30 Tensile measurements of the polyimides.
